# Supplementary material for: A high-risk retinoblastoma subtype with stemness features, dedifferentiated cone states and neuronal/ganglion cell gene expression
Source: PubMed Central journal article supplement (PMC8458383; doi:10.1038/s41467-021-25792-0), 2021-09-22
Supplement: 41467_2021_25792_MOESM3_ESM.pdf [file 41467_2021_25792_MOESM3_ESM.pdf]

### **Description of Additional Supplementary Files**

File Name: Supplementary Data 1

Description: Patient information, molecular data types available, molecular subtype assignment

File Name: Supplementary Data 2

Description: Genomic characterization, somatic mutational landscape and DNA methylation profile of retinoblastoma subtypes.

File Name: Supplementary Data 3

Description: Related to Figure 3. Differential gene expression analyses between retinoblastoma subtypes

File Name: Supplementary Data 4

Description: Late stage of cone differentiation in subtype 1 tumors and various stages of cone differentiation in subtype 2 tumors together with the expression of ganglion markers

File Name: Supplementary Data 5

Description: Single-cell transcriptomic analysis

File Name: Supplementary Data 6

Description: Independent series of metastatic retinoblastoma patients (n=19), and of a control group (n=93). Clinicopathological characteristics and immunohistochemical TFF1 data.

File Name: Supplementary Data 7

Description: List of primers used
